# Supplementary material
Source: Springer Nature journal article supplement (https://www.springermedizin.de/resource/supplementary/12889_2012_5679_MOESM1_ESM.pdf/9495964)

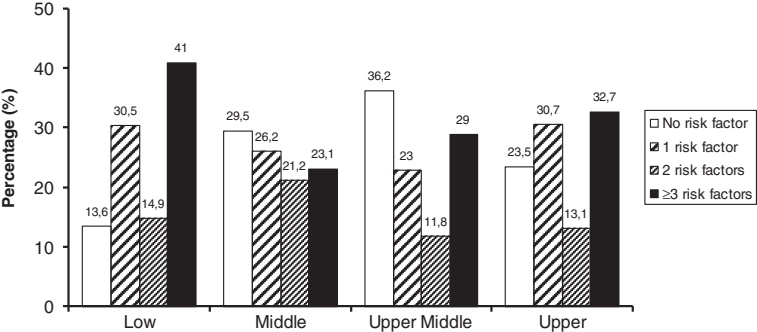

Supplement: MOESM1 [file 9495964]
